# Supplementary material for: An evidence-based evaluation of transferrable skills and job satisfaction for science PhDs
Source: PubMed Central journal article supplement (PMC5607200; doi:10.1371/journal.pone.0185023), 2017-09-20
Supplement: pone.0185023.s003.pdf [file pone.0185023.s003.pdf]

### S3 File. Job Title Survey Options

“What is your current job title? If you hold a joint appointment, please select all that apply.”

- |                                                                  |                                                                 |
|------------------------------------------------------------------|-----------------------------------------------------------------|
| <input type="checkbox"/> Academic Advisor                        | <input type="checkbox"/> Don't know                             |
| <input type="checkbox"/> Adjunct Faculty                         | <input type="checkbox"/> Editor                                 |
| <input type="checkbox"/> Adjunct Instructor                      | <input type="checkbox"/> Educator, Scientific Society           |
| <input type="checkbox"/> Analyst                                 | <input type="checkbox"/> Engineer                               |
| <input type="checkbox"/> Artist                                  | <input type="checkbox"/> Entrepreneur                           |
| <input type="checkbox"/> Assistant Dean                          | <input type="checkbox"/> Epidemiologist                         |
| <input type="checkbox"/> Assistant Director, Career Center       | <input type="checkbox"/> Field Application Specialist           |
| <input type="checkbox"/> Assistant Director, Postdoc Office      | <input type="checkbox"/> Genetics Counselor                     |
| <input type="checkbox"/> Assistant Director, Scientific Programs | <input type="checkbox"/> Grants Administrator                   |
| <input type="checkbox"/> Assistant Professor                     | <input type="checkbox"/> Graphic Designer                       |
| <input type="checkbox"/> Associate Dean                          | <input type="checkbox"/> Group Leader                           |
| <input type="checkbox"/> Associate Director, Career Center       | <input type="checkbox"/> Imaging Specialist                     |
| <input type="checkbox"/> Associate Director, Postdoc Office      | <input type="checkbox"/> Instructor                             |
| <input type="checkbox"/> Associate Director, Scientific Programs | <input type="checkbox"/> Investment Analyst                     |
| <input type="checkbox"/> Associate Professor                     | <input type="checkbox"/> Journalist                             |
| <input type="checkbox"/> Astronomer                              | <input type="checkbox"/> Laboratory Manager                     |
| <input type="checkbox"/> Astrophysicist                          | <input type="checkbox"/> Lecturer                               |
| <input type="checkbox"/> Biologist                               | <input type="checkbox"/> Management Consultant                  |
| <input type="checkbox"/> Biostatistician                         | <input type="checkbox"/> Manager                                |
| <input type="checkbox"/> Botanist                                | <input type="checkbox"/> Market Researcher                      |
| <input type="checkbox"/> Business Development Analyst            | <input type="checkbox"/> Marketing Specialist                   |
| <input type="checkbox"/> Career Counselor                        | <input type="checkbox"/> Mathematician                          |
| <input type="checkbox"/> Chemist                                 | <input type="checkbox"/> Medical Informaticist                  |
| <input type="checkbox"/> Chief Executive Officer                 | <input type="checkbox"/> Medical Science Liaison                |
| <input type="checkbox"/> Chief Scientific Officer                | <input type="checkbox"/> Medical Writer                         |
| <input type="checkbox"/> Classroom Teacher                       | <input type="checkbox"/> Museum Educator                        |
| <input type="checkbox"/> Clinical Psychologist                   | <input type="checkbox"/> Neuroscientist                         |
| <input type="checkbox"/> Clinical Trials Coordinator             | <input type="checkbox"/> Other                                  |
| <input type="checkbox"/> Clinical Trials Manager                 | <input type="checkbox"/> Patent Agent                           |
| <input type="checkbox"/> Consultant                              | <input type="checkbox"/> Patent Attorney                        |
| <input type="checkbox"/> Curriculum Developer                    | <input type="checkbox"/> Patent Law Clerk                       |
| <input type="checkbox"/> Data Analyst                            | <input type="checkbox"/> Physician                              |
| <input type="checkbox"/> Data Scientist                          | <input type="checkbox"/> Physicist                              |
| <input type="checkbox"/> Dean                                    | <input type="checkbox"/> Policy Analyst                         |
| <input type="checkbox"/> Department Chair                        | <input type="checkbox"/> President                              |
| <input type="checkbox"/> Director, Core Facility                 | <input type="checkbox"/> Principal Investigator                 |
| <input type="checkbox"/> Director, Education                     | <input type="checkbox"/> Product Development Scientist/Engineer |
| <input type="checkbox"/> Director, Postdoctoral Affairs          | <input type="checkbox"/> Professor                              |
| <input type="checkbox"/> Director, Research and Development      | <input type="checkbox"/> Program Analyst                        |
|                                                                  | <input type="checkbox"/> Program Manager                        |

- Program Officer
- Project Manager
- Public Outreach Specialist
- Quality Control Specialist
- Quantitative Researcher
- Regulatory Affairs Specialist
- Research Administrator
- Research Analyst
- Research Assistant
- Research Associate
- Research Assistant Professor
- Research Associate Professor
- Research Professor
- Research Scientist
- Researcher
- Science Writer
- Scientist

- Senior Lecturer
- Senior Quantitative Researcher
- Senior Scientist
- Senior Staff Scientist
- Staff Scientist
- Statistician
- Technical Sales Representative
- Technical Support Specialist
- Technical Writer
- Technology Transfer Specialist
- Therapist
- Venture Capital Analyst
- Vice President, Research and Development
- Visiting Assistant Professor
- Visiting Associate Professor
- Visiting Professor
